# Supplementary material for: Rapid polymorphic screening using sessile microdroplets: competitive nucleation of mannitol polymorphs
Source: Royal Society of Chemistry journal article supplement (doi:10.1039/d4ce00648h), 2024-01-01
Supplement: d4ce00648h1.pdf [file d4ce00648h1.pdf]

Supplementary Material for:

## Rapid Polymorphic Screening using Sessile Microdroplets: Competitive Nucleation of Mannitol Polymorphs

Ruel Cedeno<sup>1</sup>, Romain Grossier<sup>1</sup>, Nadine Candoni<sup>1</sup>, Stéphane Veessler<sup>1\*</sup>

<sup>1</sup>CNRS, Aix-Marseille Université, CINaM (Centre Interdisciplinaire de Nanosciences de Marseille), Campus de Luminy, Case 913, F-13288 Marseille Cedex 09, France

### S1. Evaporation Model

**Table S1** Numerical values used as input in evaporation model<sup>1</sup> for aqueous D-mannitol droplets and Mersmann correlation<sup>2</sup>, referenced at 25°C and 1 atm.

| Quantity                                                         | Symbol      | Value                  | Unit                           |
|------------------------------------------------------------------|-------------|------------------------|--------------------------------|
| solubility of water in PDMS oil <sup>1</sup>                     | $c_s$       | 8.76                   | mol/m <sup>3</sup>             |
| diffusivity of water in PDMS oil <sup>1</sup>                    | $D$         | $6.74 \times 10^{-9}$  | m <sup>2</sup> s <sup>-1</sup> |
| supersaturation at matching time*                                | $S_{match}$ | 4.00                   | -                              |
| coefficient of density change for mannitol <sup>3</sup>          | $b_1$       | 0.0719                 | -                              |
| coefficient of water activity lowering for mannitol <sup>4</sup> | $b_2$       | 0.194                  | -                              |
| solubility of $\beta$ -mannitol in water <sup>5</sup>            | $c_{eq}$    | 1.185                  | mol/kg                         |
| solubility of $\beta$ -mannitol in water <sup>5</sup>            | $c_{eq}$    | 1217.4                 | mol/m <sup>3</sup>             |
| solubility of $\alpha$ -mannitol in water <sup>5</sup>           | $c_{eq}$    | 1453.0                 | mol/m <sup>3</sup>             |
| solubility of $\delta$ -mannitol in water <sup>5</sup>           | $c_{eq}$    | 1667.5                 | mol/m <sup>3</sup>             |
| equilibrium solid-state $\beta$ -mannitol <sup>5</sup>           | $C_{sol}$   | 8323.7                 | mol/m <sup>3</sup>             |
| equilibrium solid-state $\alpha$ -mannitol <sup>5</sup>          | $C_{sol}$   | 8210.5                 | mol/m <sup>3</sup>             |
| equilibrium solid-state $\delta$ -mannitol <sup>5</sup>          | $C_{sol}$   | 8365.6                 | mol/m <sup>3</sup>             |
| molar mass of mannitol                                           | $M_{Man}$   | 0.182                  | kg/mol                         |
| diffusivity of mannitol in water <sup>6</sup>                    | $D_i$       | $6.05 \times 10^{-10}$ | m <sup>2</sup> /s              |
| density of pure water <sup>7</sup>                               | $\rho_w$    | 997                    | kg/m <sup>3</sup>              |

\*measured by monitoring/interpolating the droplet volume (lateral view) as it optically disappears, supersaturation  $S = c/c_{eq}$

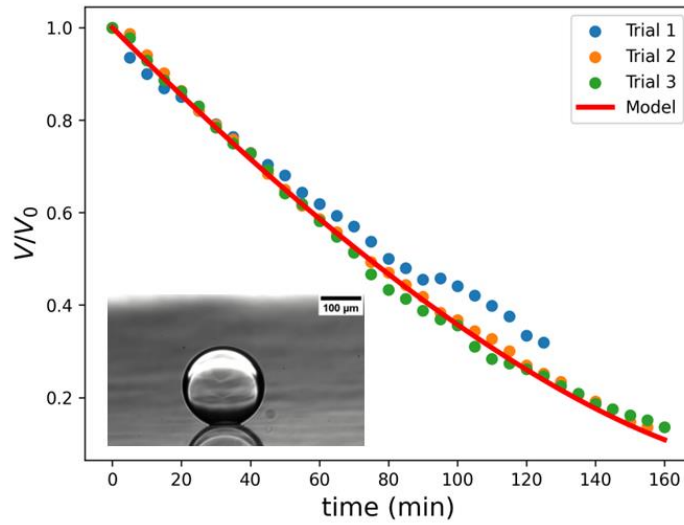

**Figure S1.** Evolution of relative droplet volume ( $V/V_0$ ) as a function of time (3 replicates) taken from lateral images.

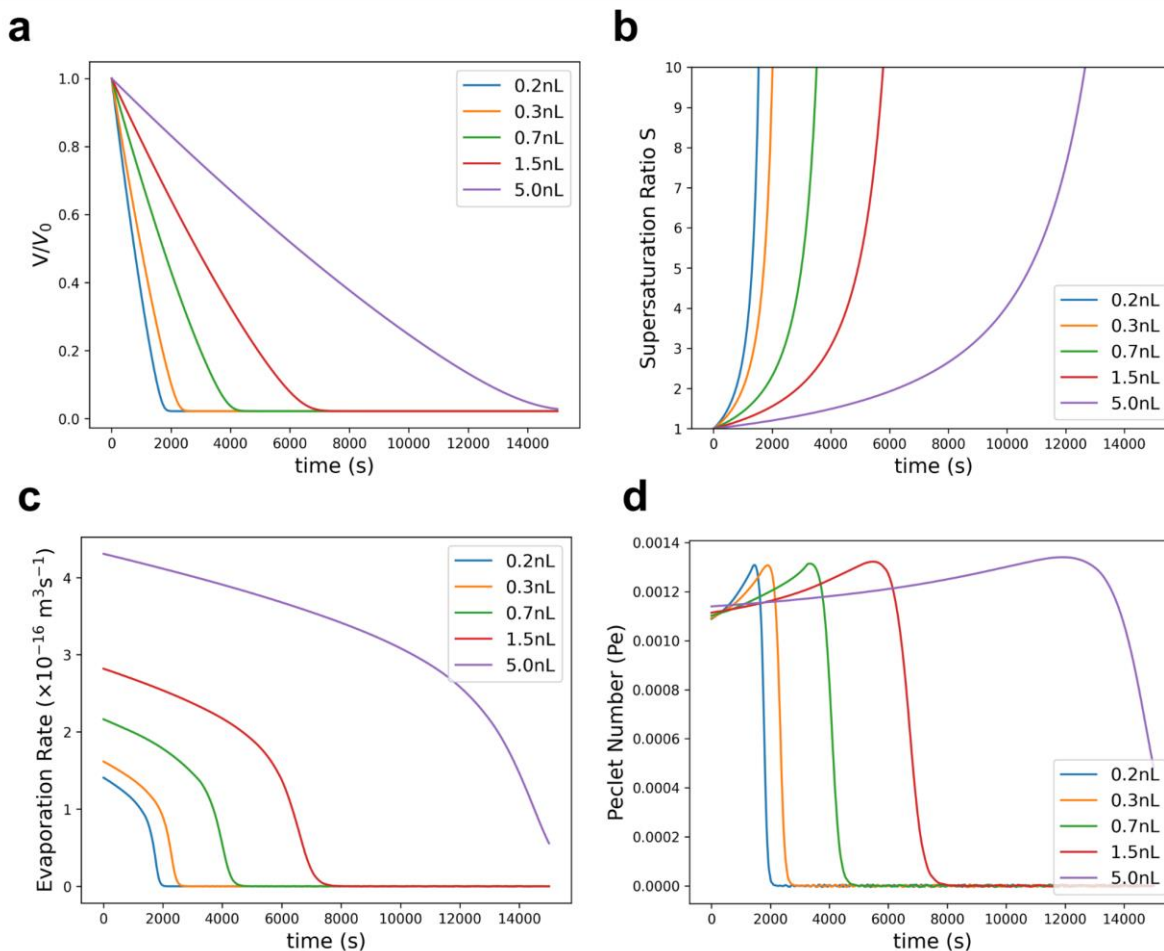

**Figure S2.** Model predictions for bottom-view arrays of microdroplets in terms of (a) relative volume  $V/V_0$  (b) supersaturation ratio (c) evaporation rate (d) Peclet number<sup>1, 8</sup>.  $Pe < 1$  suggests a uniform distribution of concentration within the droplet. The droplets were subjected under the following conditions:  $RH = 0.10$ ,  $T = 25^\circ\text{C}$ ,  $P = 1 \text{ atm}$ .

## REFERENCES

1. Cedeno, R.; Grossier, R.; Tishkova, V.; Candoni, N.; Flood, A. E.; Veessler, S., Evaporation Dynamics of Sessile Saline Microdroplets in Oil. *Langmuir* **2022**, *38* (31), 9686-9696.
2. Mersmann, A., Calculation of interfacial tensions. *J. Cryst. Growth* **1990**, *102* (4), 841-847.
3. Zhu, C.; Ma, Y.; Zhou, C., Densities and Viscosities of Sugar Alcohol Aqueous Solutions. *Journal of Chemical & Engineering Data* **2010**, *55* (9), 3882-3885.
4. Ninni, L.; Camargo, M. S.; Meirelles, A. J. A., Water Activity in Polyol Systems. *Journal of Chemical & Engineering Data* **2000**, *45* (4), 654-660.
5. Su, W.; Hao, H.; Glennon, B.; Barrett, M., Spontaneous Polymorphic Nucleation of d-Mannitol in Aqueous Solution Monitored with Raman Spectroscopy and FBRM. *Cryst. Growth Des.* **2013**, *13* (12), 5179-5187.
6. Bashkatov, A. N.; Genina, E. A.; Sinichkin, Y. P.; Kochubey, V. I.; Lakodina, N. A.; Tuchin, V. V., Glucose and mannitol diffusion in human dura mater. *Biophys. J.* **2003**, *85* (5), 3310-8.
7. Don, W. G.; Robert, H. P., *Perry's Chemical Engineers' Handbook, Eighth Edition*. 8th ed. / ed.; McGraw-Hill Education: New York, 2008.
8. Gregson, F. K. A.; Robinson, J. F.; Miles, R. E. H.; Royall, C. P.; Reid, J. P., Drying Kinetics of Salt Solution Droplets: Water Evaporation Rates and Crystallization. *The Journal of Physical Chemistry B* **2019**, *123* (1), 266-276.
